# Supplementary material
Source: publisher figshare collection journal article supplement (https://acs.figshare.com/ndownloader/files/12856961)
Supplement: Supplementary file 1 [file 12856961]

# Supporting Information

## MS spectra

Abundance

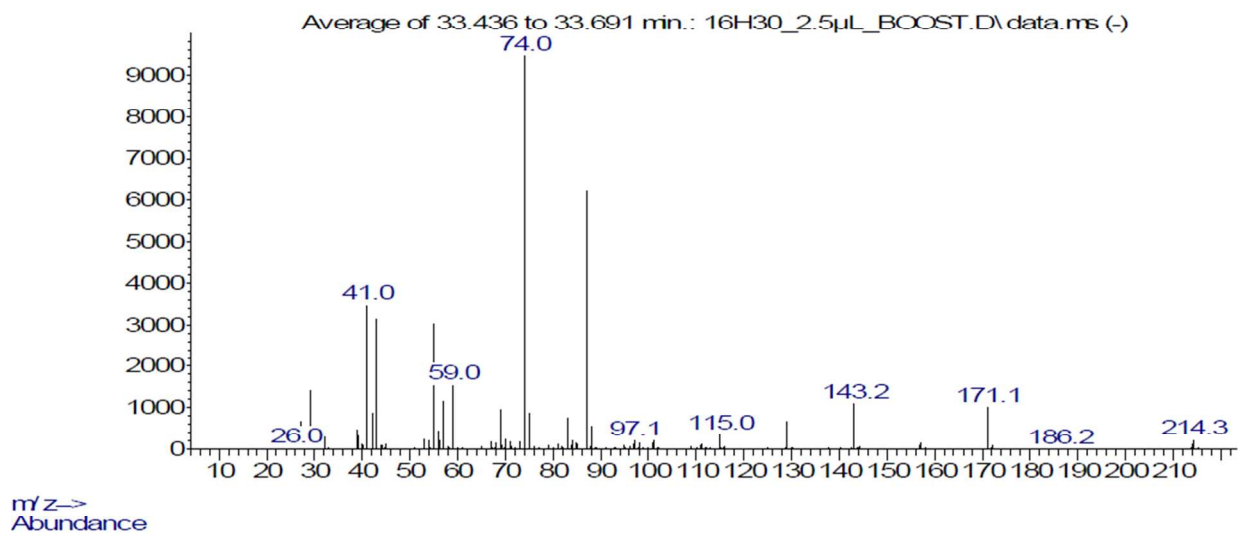

m/z→

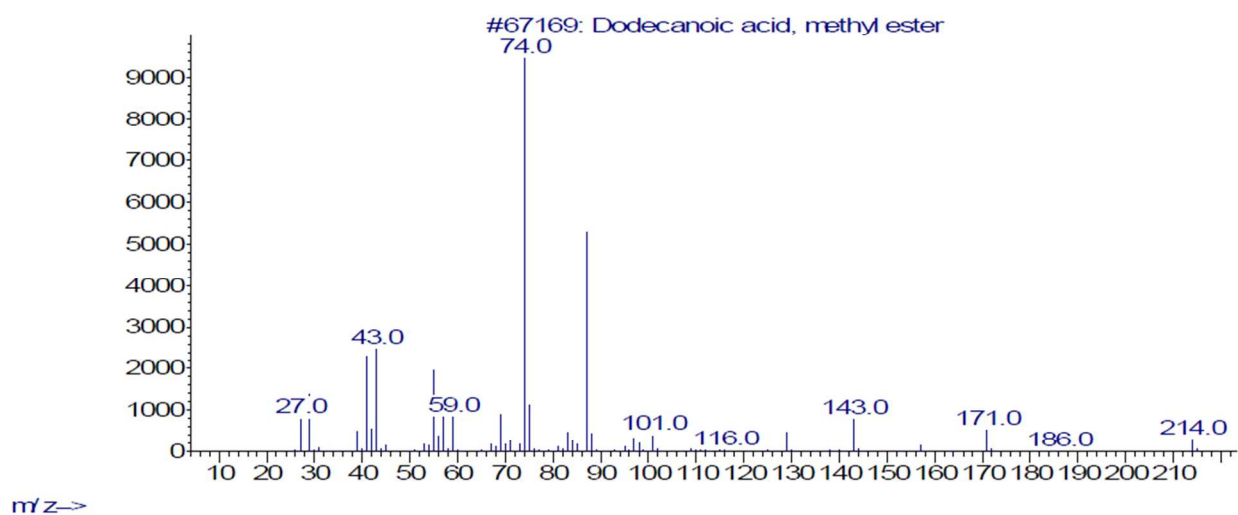

Figure 1. (Up) experimental (down) theoretical spectra of dodecanoic methyl ester

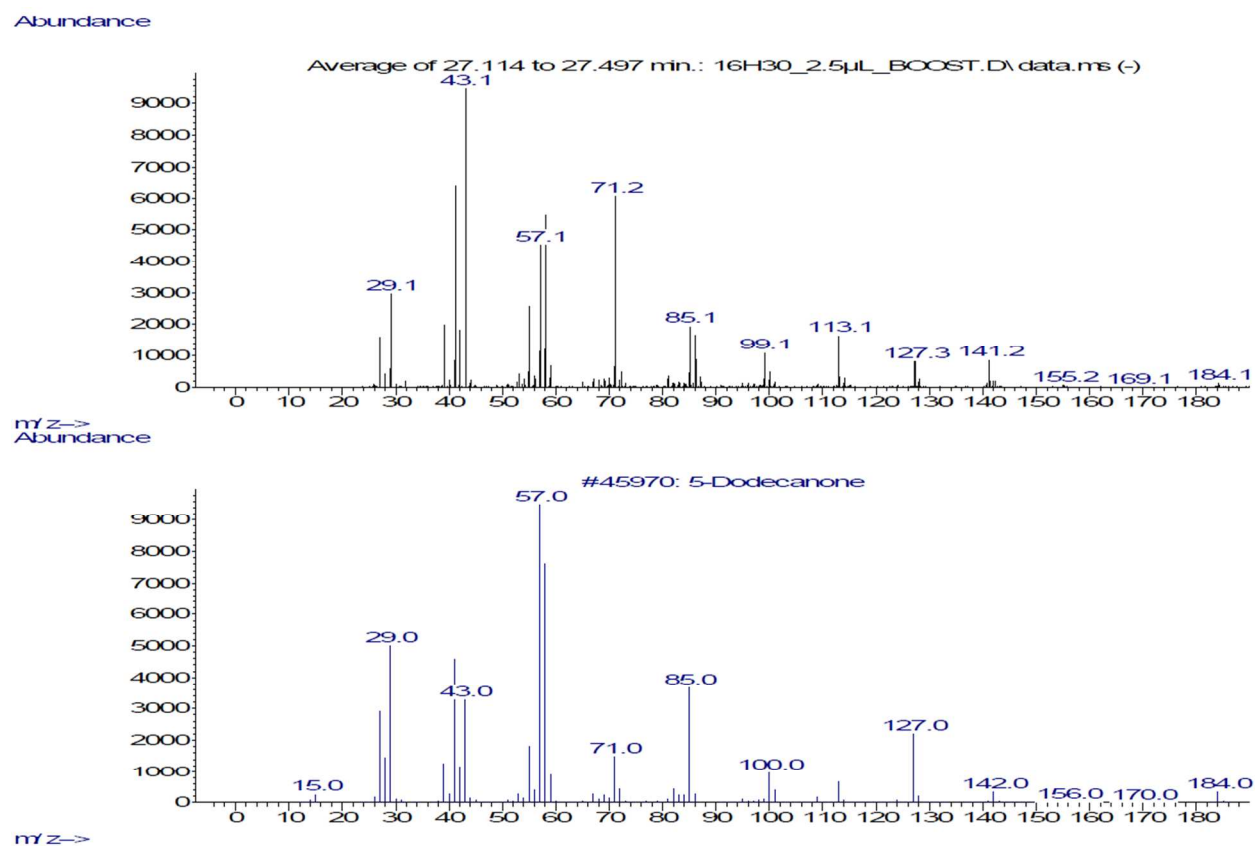

Figure 2. (Up) experimental (down) theoretical spectra of 5-dodecanone

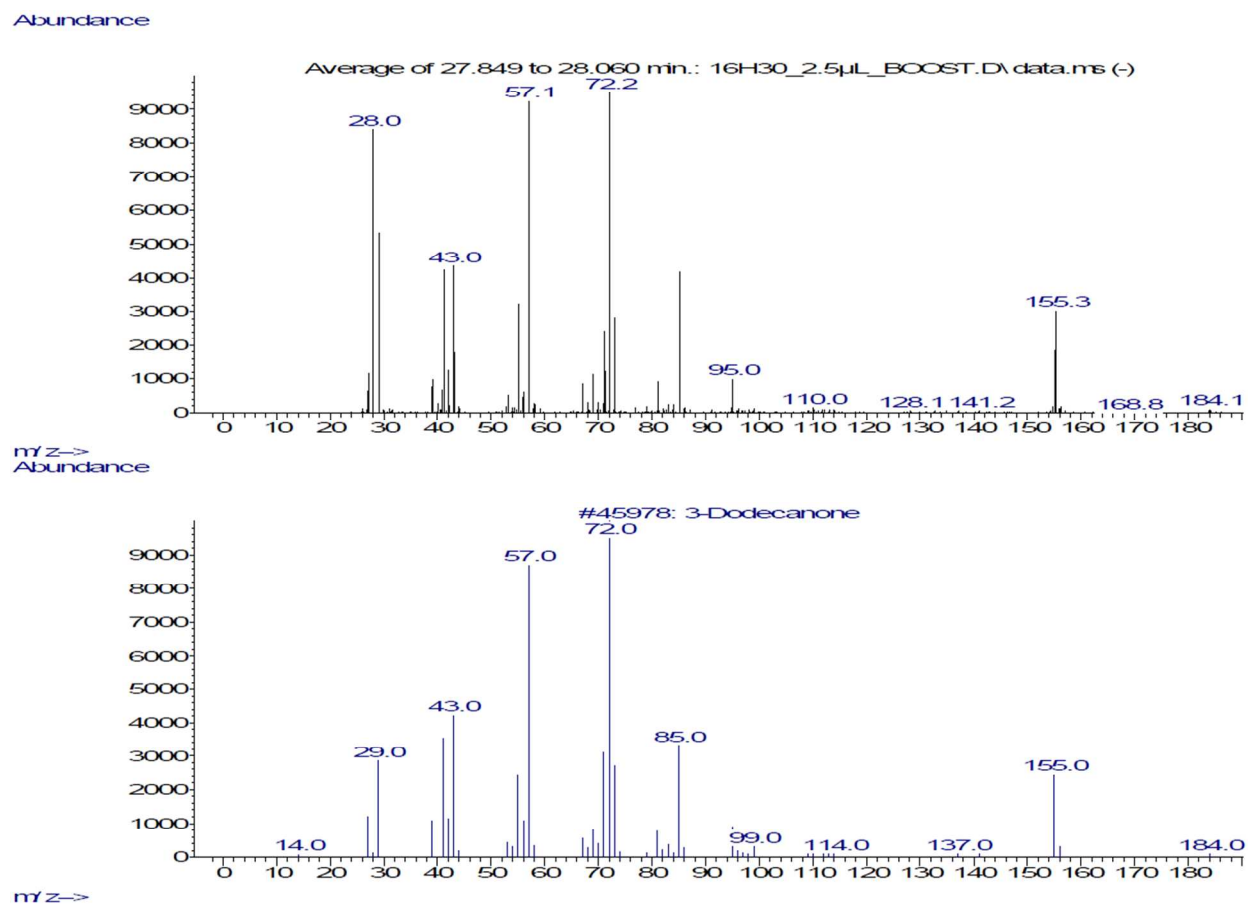

Figure 3. (Up) experimental (down) theoretical spectra of 3-dodecanone

Abundance

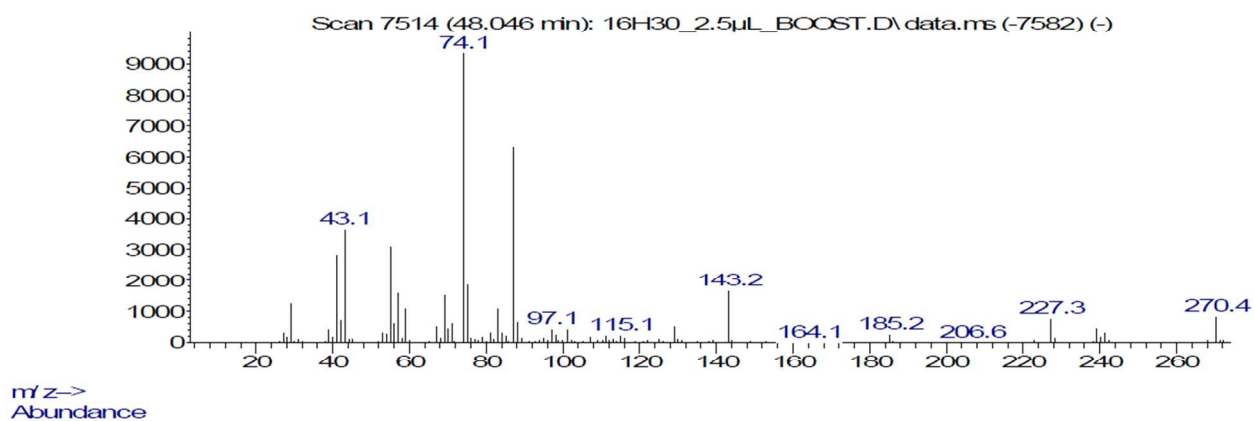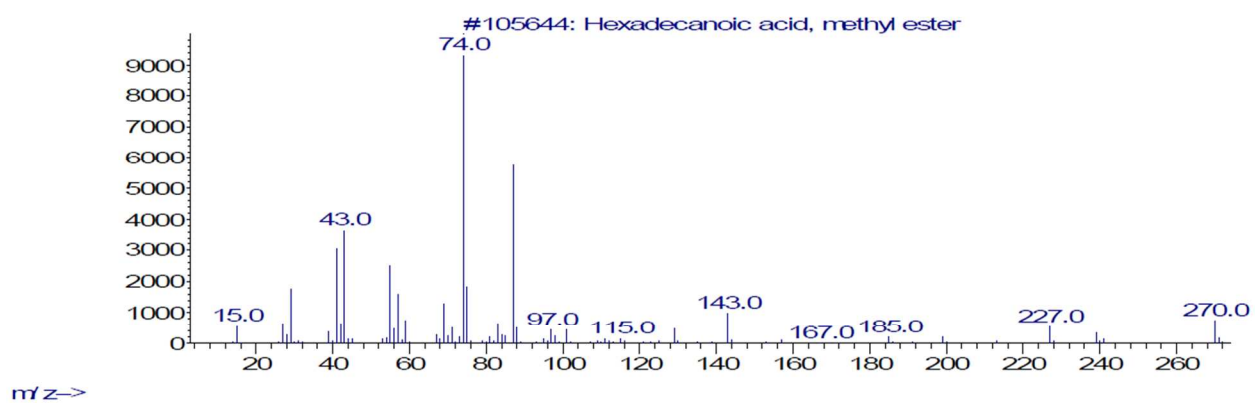

Figure 4. (Up) experimental (down) theoretical spectra of hexadecanoic acid methyl ester

Abundance

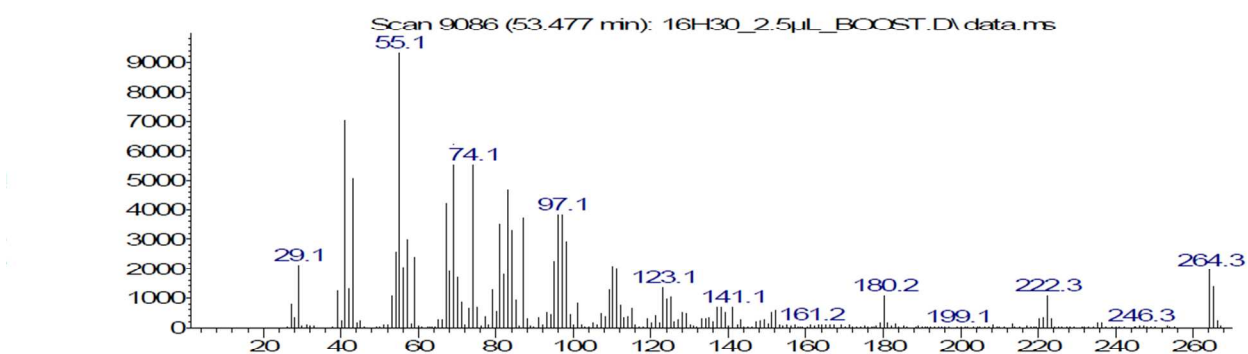

m/z→  
Abundance

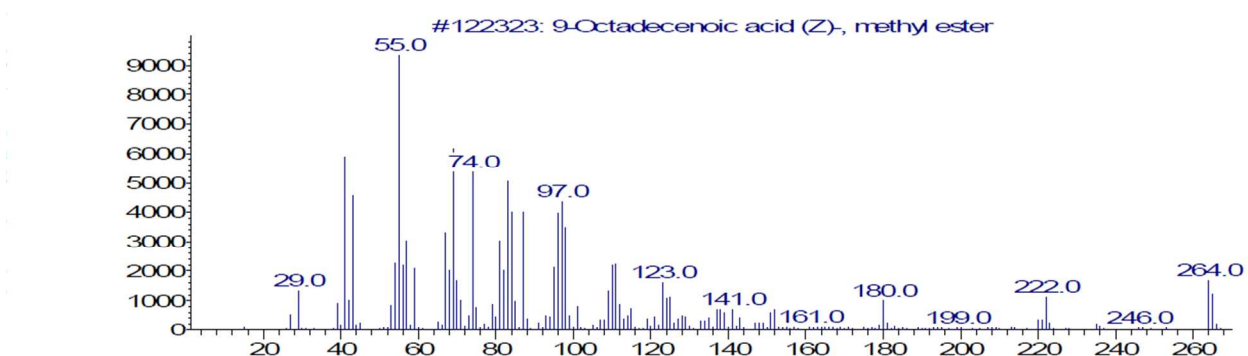

m/z→

Figure 5. (Up) experimental (down) theoretical spectra of methyl oleate

Abundance

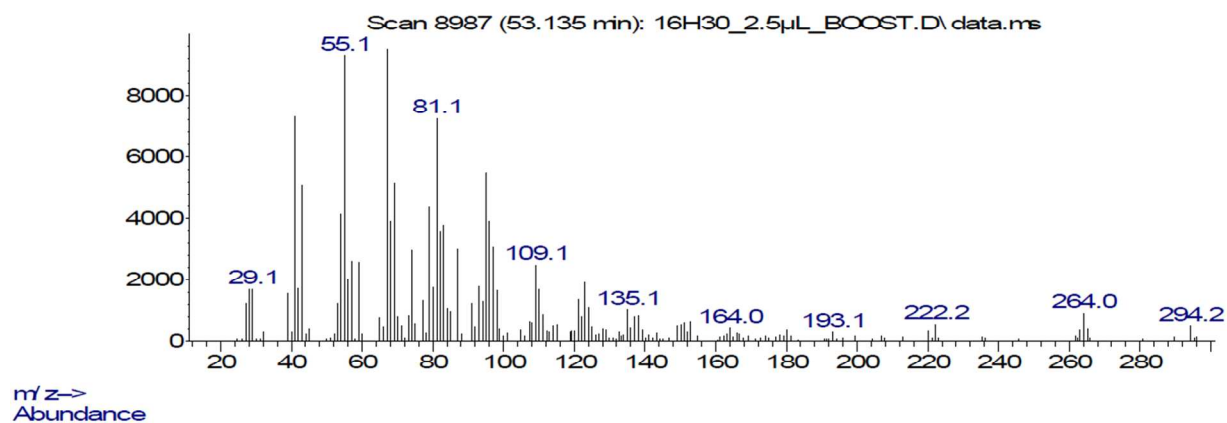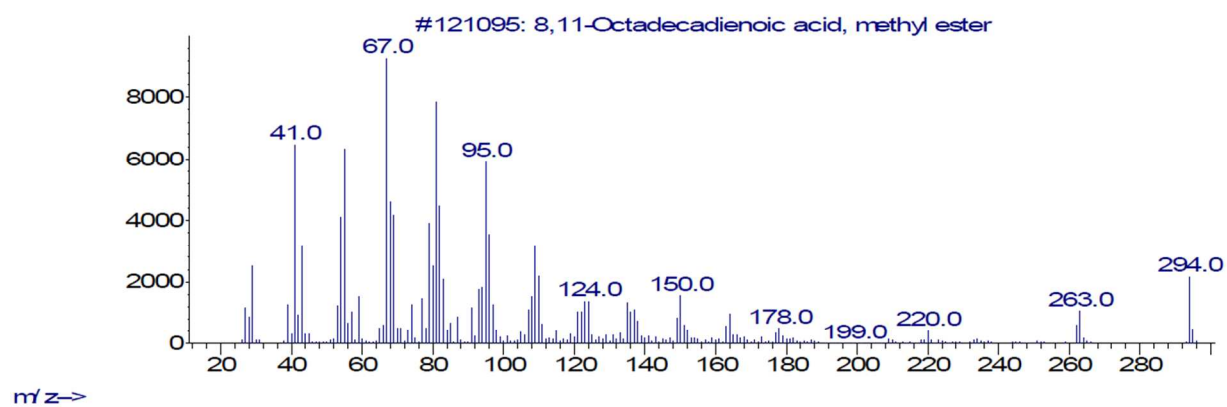

Figure 6. (Up) experimental (down) theoretical spectra of 8,11 – octadecadienoic acid methyl ester

Abundance

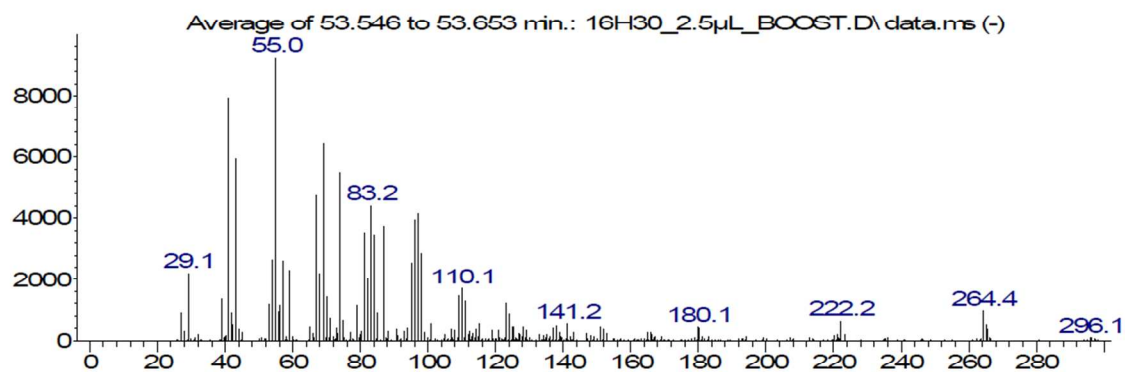

m/z→

Abundance

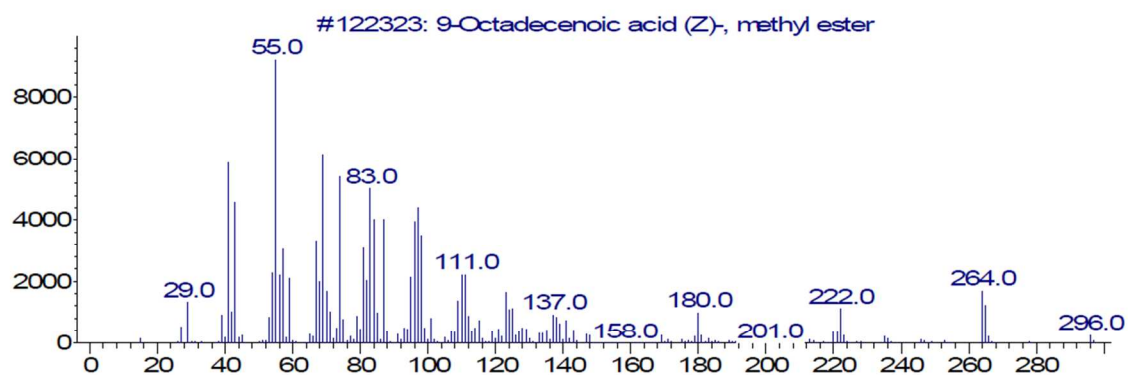

m/z→

Figure 7. (Up) experimental (down) theoretical spectra of 9-octadecenoic acid (Z)-, methyl ester

Abundance

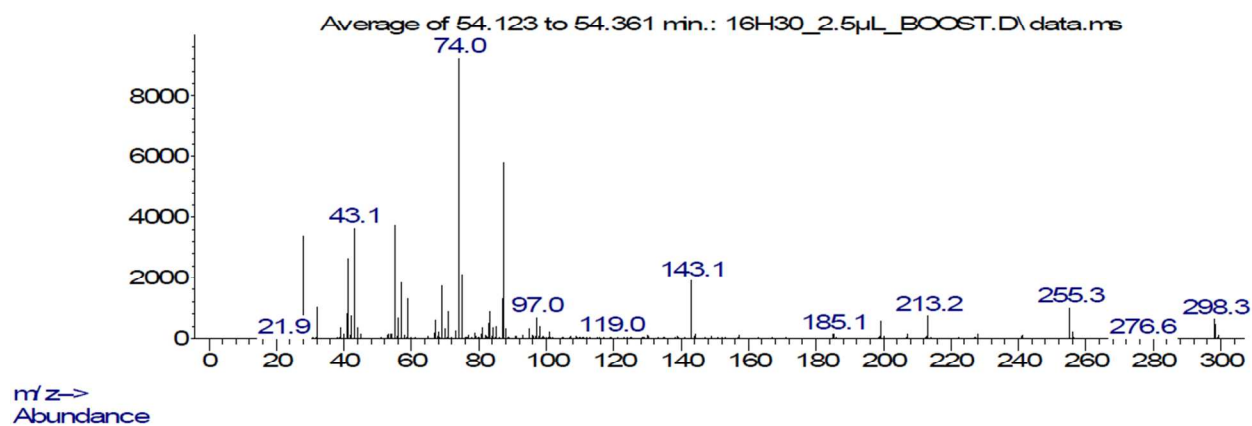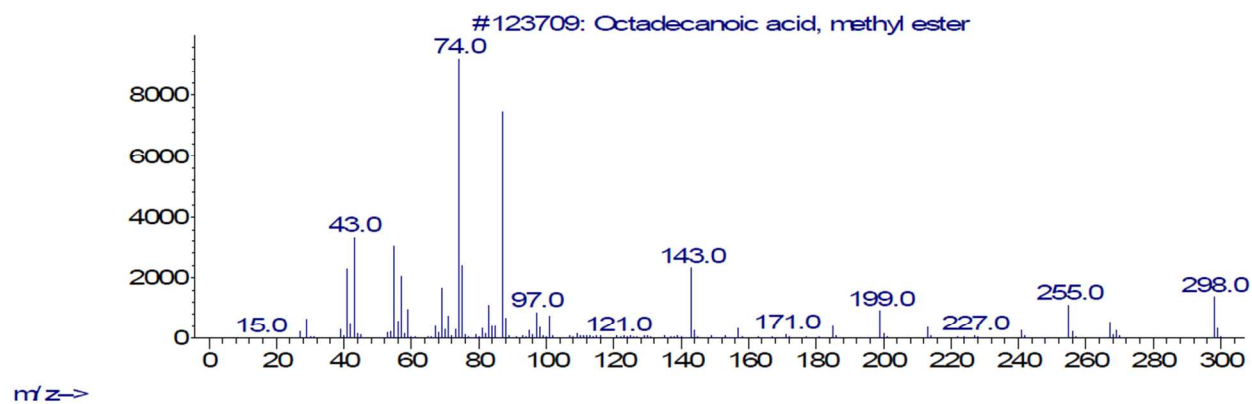

Figure 8. (Up) experimental (down) theoretical spectra of octadecanoic acid, methyl ester

Abundance

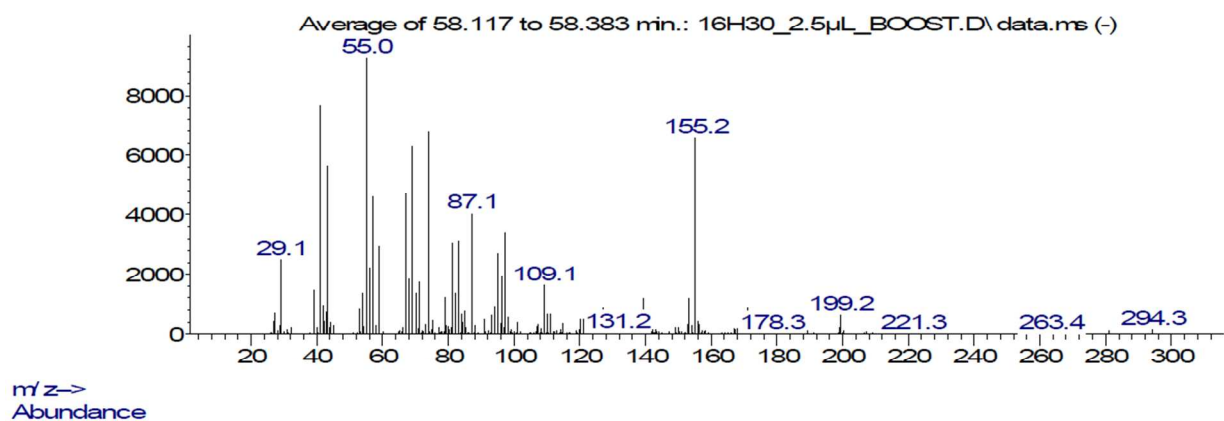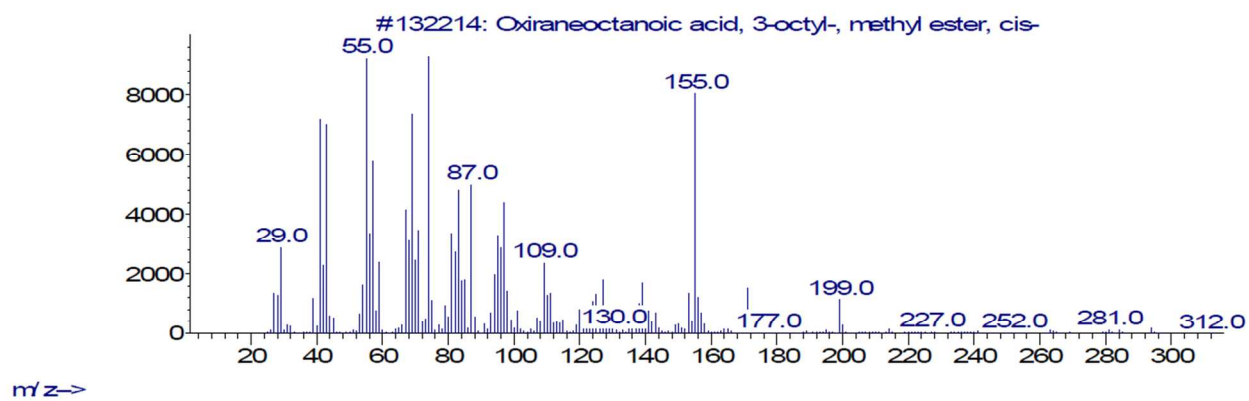

Figure 9. (Up) experimental (down) theoretical spectra of oxiraneoctadecanoic, 3-octyl-, méthyl ester
